# Supplementary material
Source: Research Square preprint supplement (doi:10.21203/rs.3.rs-8348792/v1)
Supplement: Supplementary file 1 [file a1ebc91d3cd500d344e0bb7c.doc]

**Table S1.** Primer sequences and PCR conditions with observed products of rs4149117 variant.

| **SNP** | **Primer Sequence (5'-3’)** | **PCR conditions** | **No. of PCR cycles** | **Polymorphism** | **Size of PCR products (bp)** |
| --- | --- | --- | --- | --- | --- |
| **SLCO1B3**  **rs4149117** | FI: TCCTTATGGGAACTGGAAGTATTTTGATAG RI: ACTATCCCATGAAGAAATGTGGTAAGGA  FO: TTGGGGCATTCAGTTCTACTAGATACAA  RO: TCAAAAGGTAACTGCCCACTTACAAGTA | 95°C for 5 minutes  95°C for 30 seconds  60°C for 45 seconds  72°C for 30 seconds  72°C for 10 minutes  4°C for ∞ | 35 cycles | G > T | NH: GG: 154, 302  HE: GT: 154, 206, 302  MH: TT: 206, 302 |

*Here, SNP: Single nucleotide polymorphism; PCR: Polymerase chain reaction; FI: Forward inner; RI: Reverse inner; FO: Forward outer; RO: Reverse outer; bP: Base-pair*

**Table S2.** Primer sequences, PCR conditions with observed products, restriction enzyme, digestion conditions, polymorphism, and expected fragment sizes of rs11572080 and rs17222723 variants.

| **SNP** | **Primer Sequence (5'-3’)** | **PCR conditions** | **No. of PCR cycles** | **Size of PCR products (bp)** | **Restriction Enzyme** | **Digestion**  **Condition** | **Polymorphism** | **Expected Fragments**  **(bp)** |
| --- | --- | --- | --- | --- | --- | --- | --- | --- |
| **CYP2C8*3**  **rs11572080** | FP: CAGGATGCGCAATGAAGA  RP: AGGCAATTCCCCAATATCTC | 95°C for 5 minutes  95°C for 30 seconds  51°C for 30 seconds  72°C for 30 seconds  72°C for 10 minutes  4°C for ∞ | 35 cycles | 467 | BseRI | Incubation at 37°C for overnight | C > T | CC: 46, 113, 308  CT: 46, 113, 308, 354  TT: 113, 354 |
| **ABCC2**  **rs17222723** | FP: GTAAGCTGTGCCCATCAAGG  RP: CCTCCCACCGCTAATATCAA | 95°C for 5 minutes  95°C for 30 seconds  55°C for 30 seconds  72°C for 30 seconds  72°C for 10 minutes  4°C for ∞ | 35 cycles | 383 | BseRI | Incubation at 37°C for overnight | T > A | TT: 383  TA: 113, 270, 383  AA: 113, 270 |

*Here, SNP: Single nucleotide polymorphism; PCR: Polymerase chain reaction; bP: Base-pair*
